# Supplementary material
Source: PubMed Central journal article supplement (PMC7597937)

# Supplementary Figures

Supplementary 1 : Expression of NPY is slightly overexpressed in tumor samples compared to normal tissues.

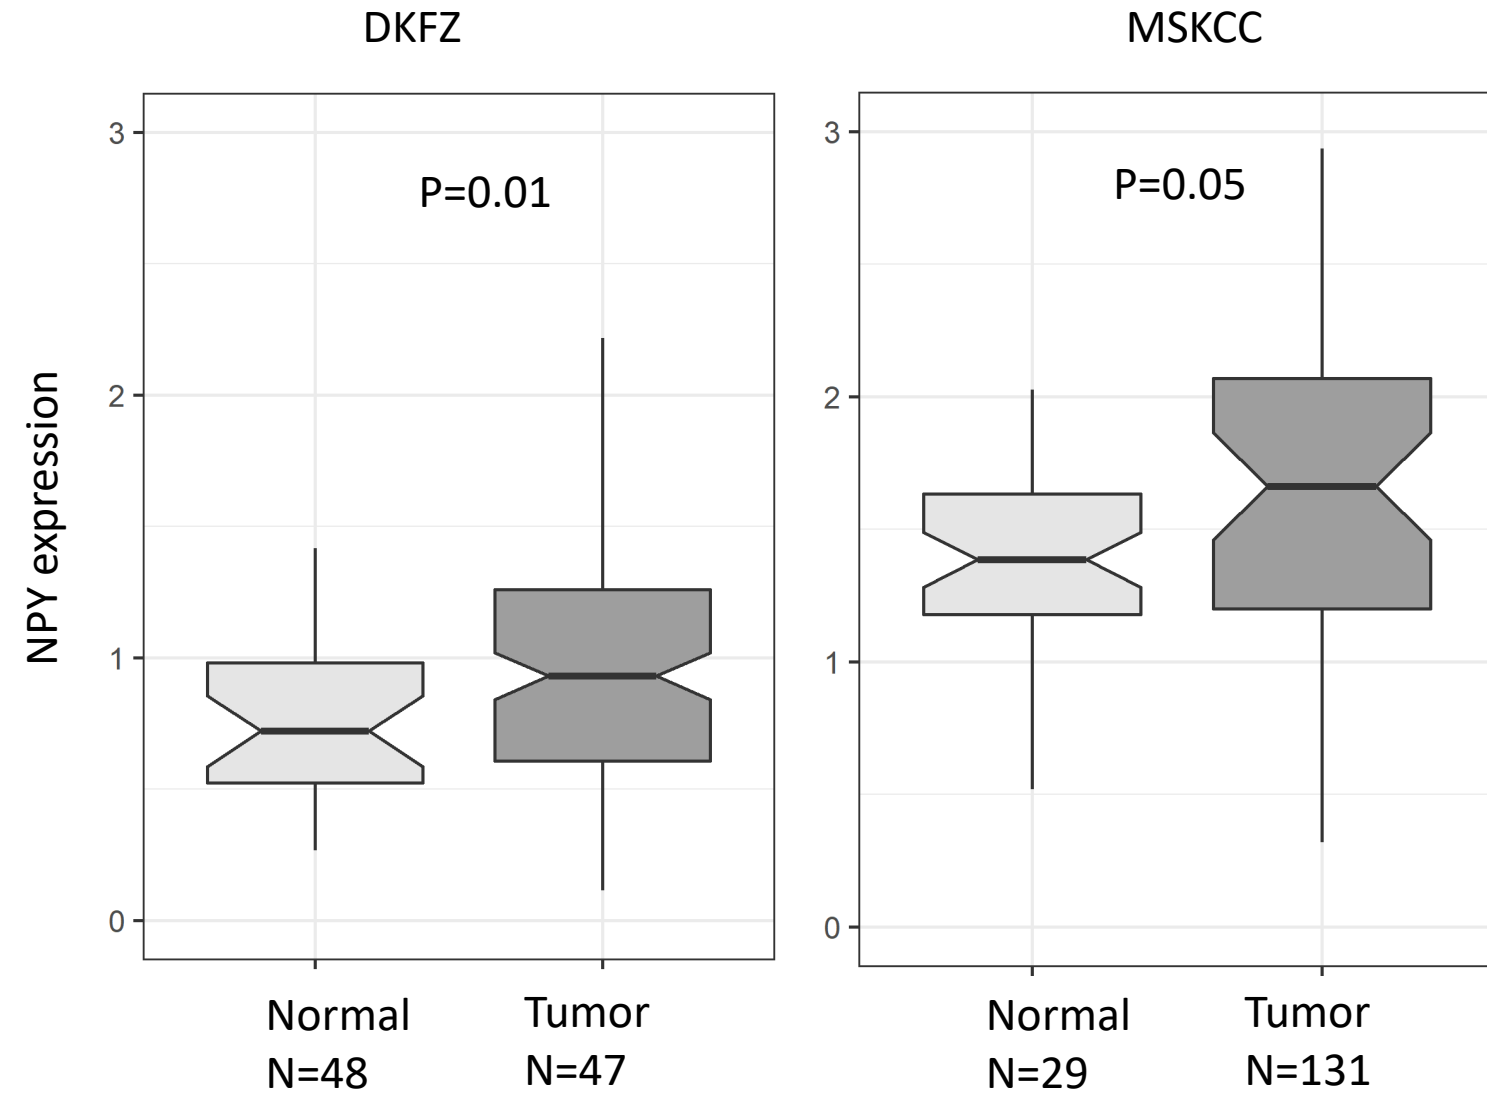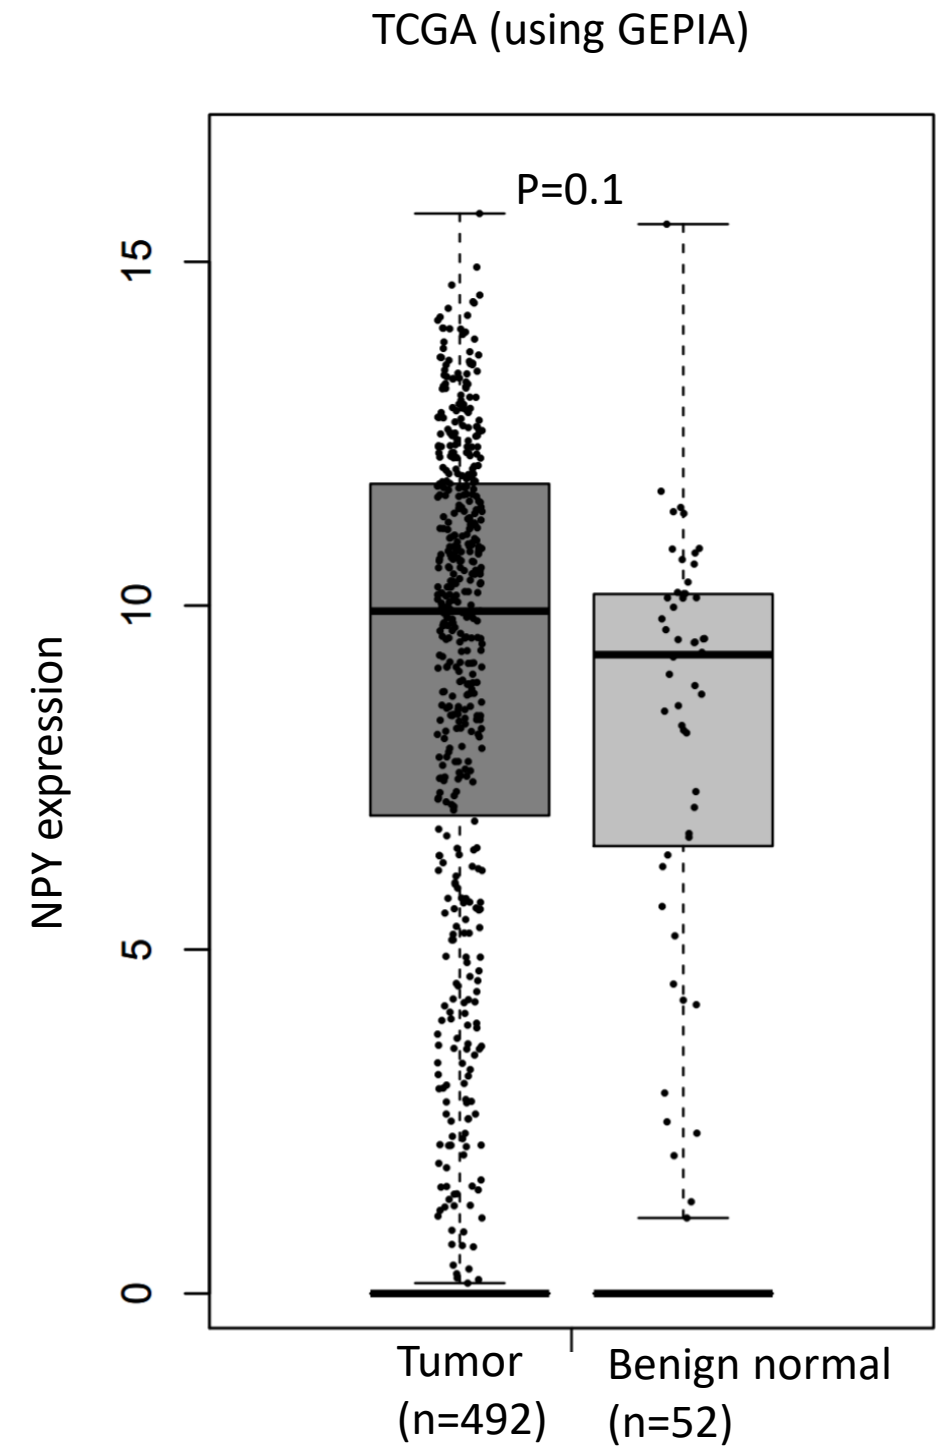

Supplementary 2: Density distribution of NPY expression in the JHMI cohort

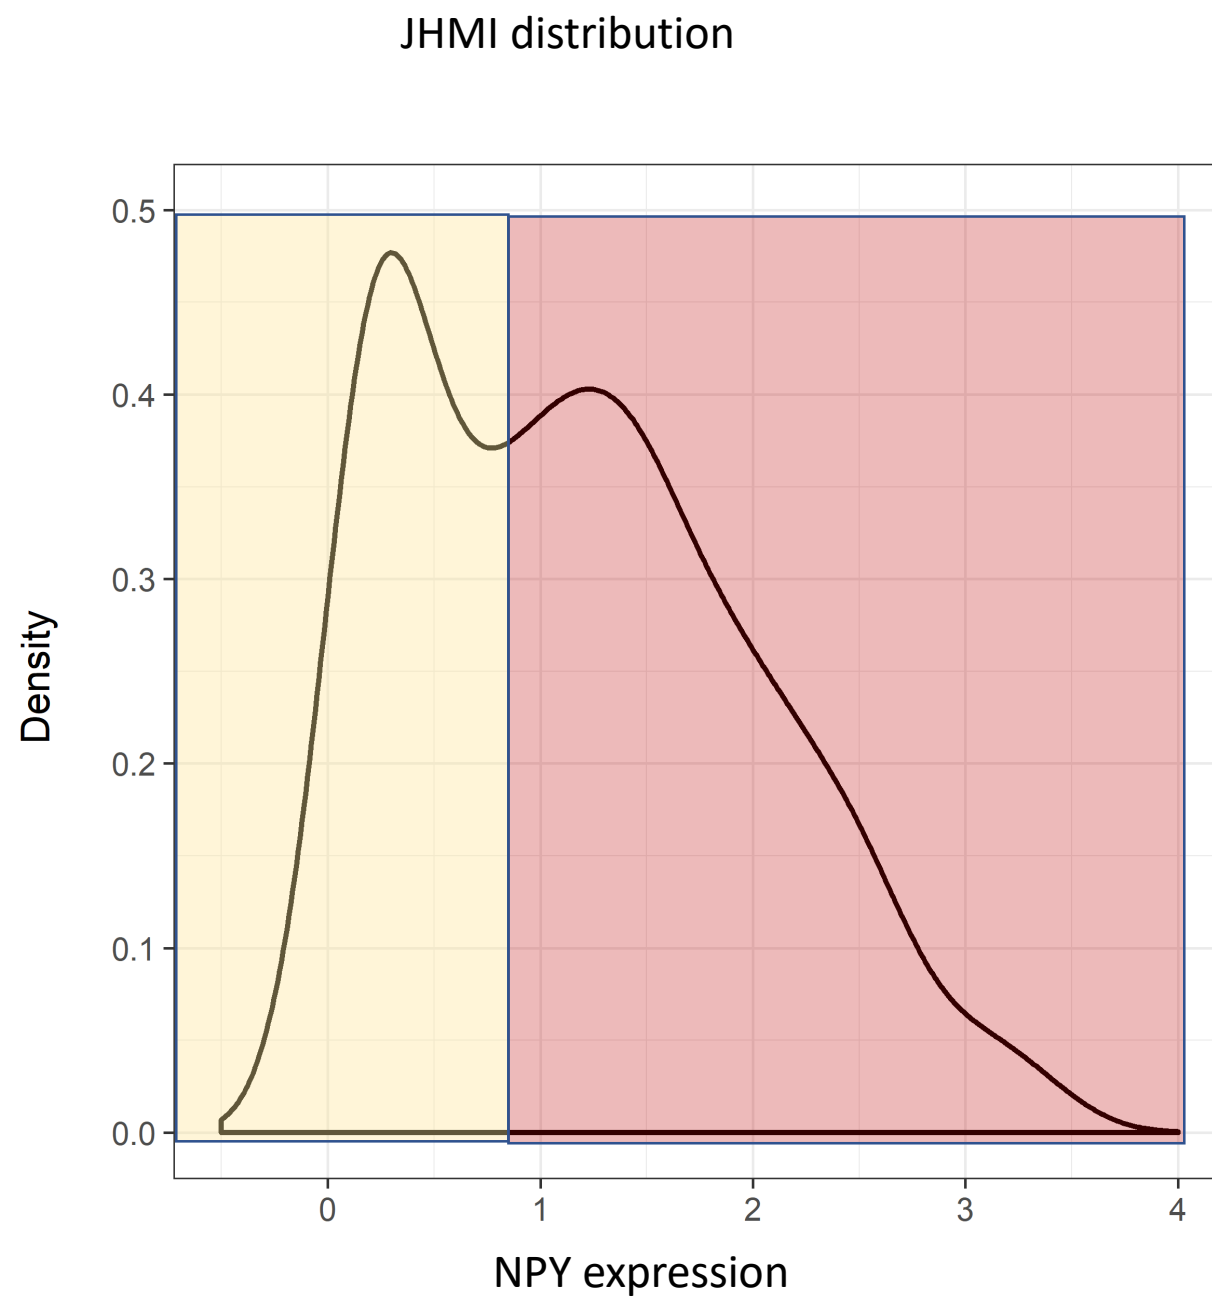

Supplementary 3: Associations between NPY expression and clinical variables in GRID

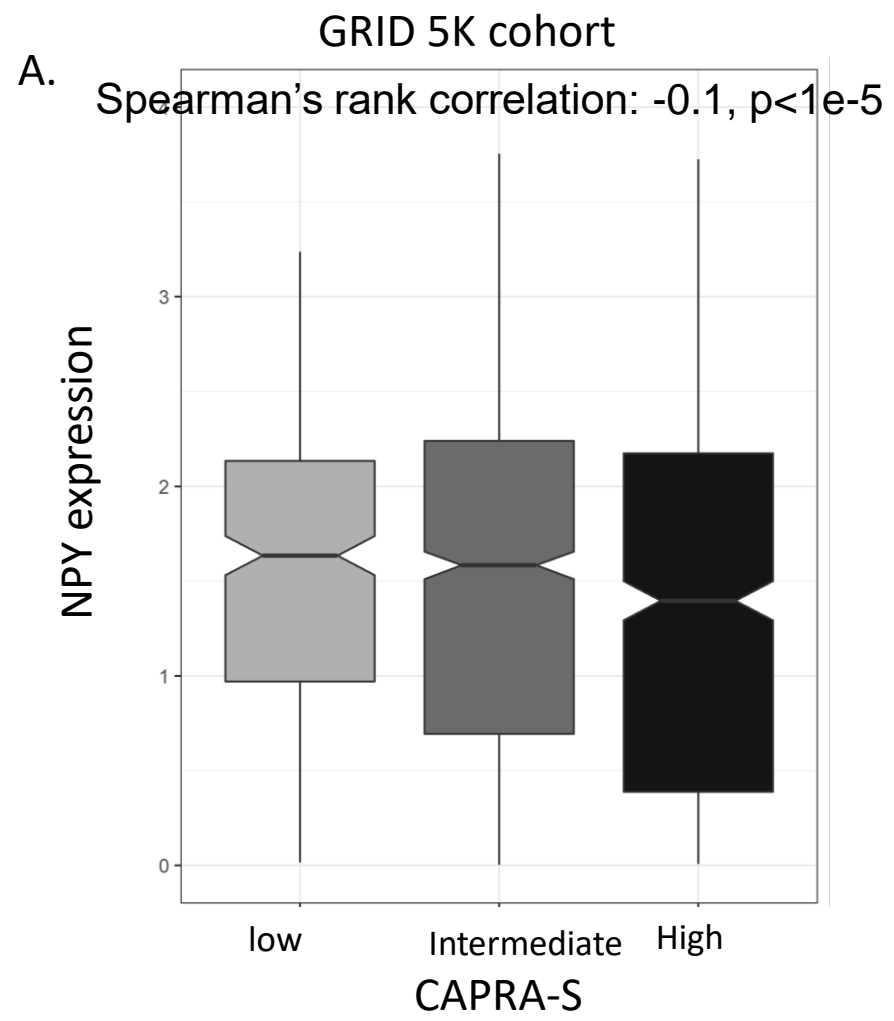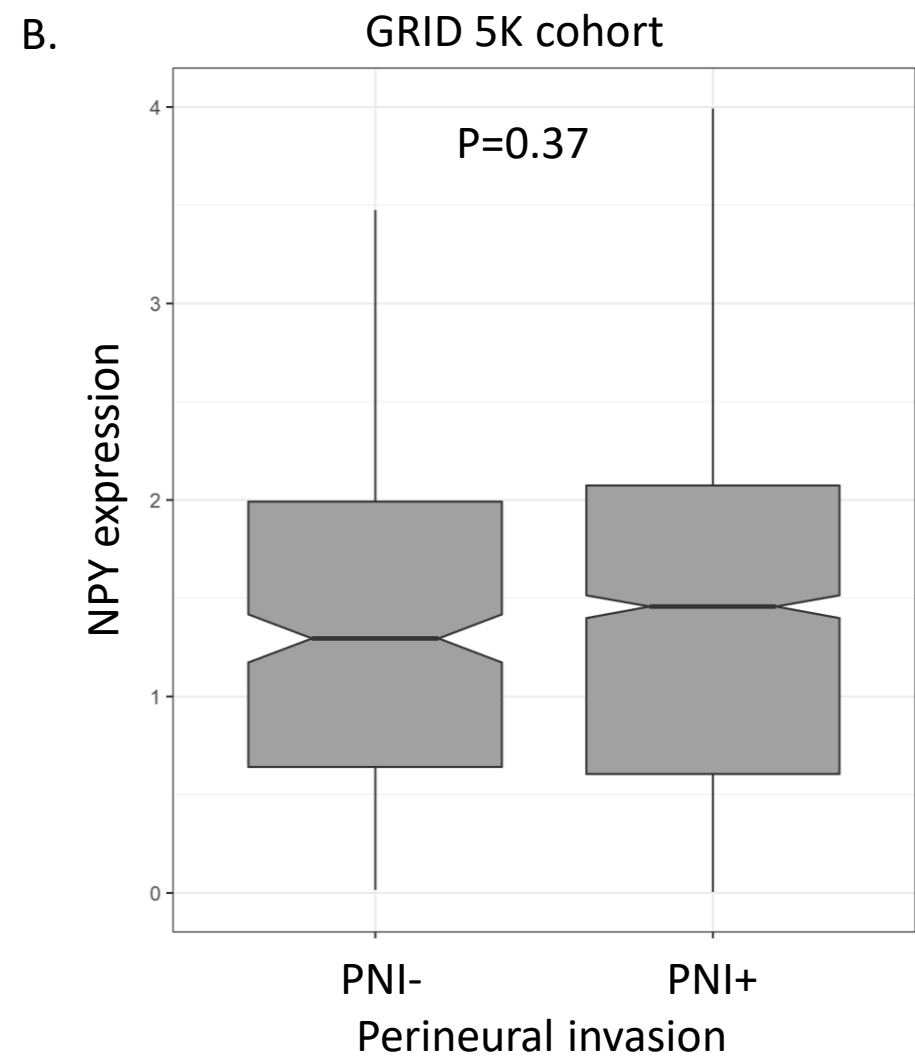

Supplementary 4. Associations between NPY expression and Gleason groups in the 12K GRID cohort

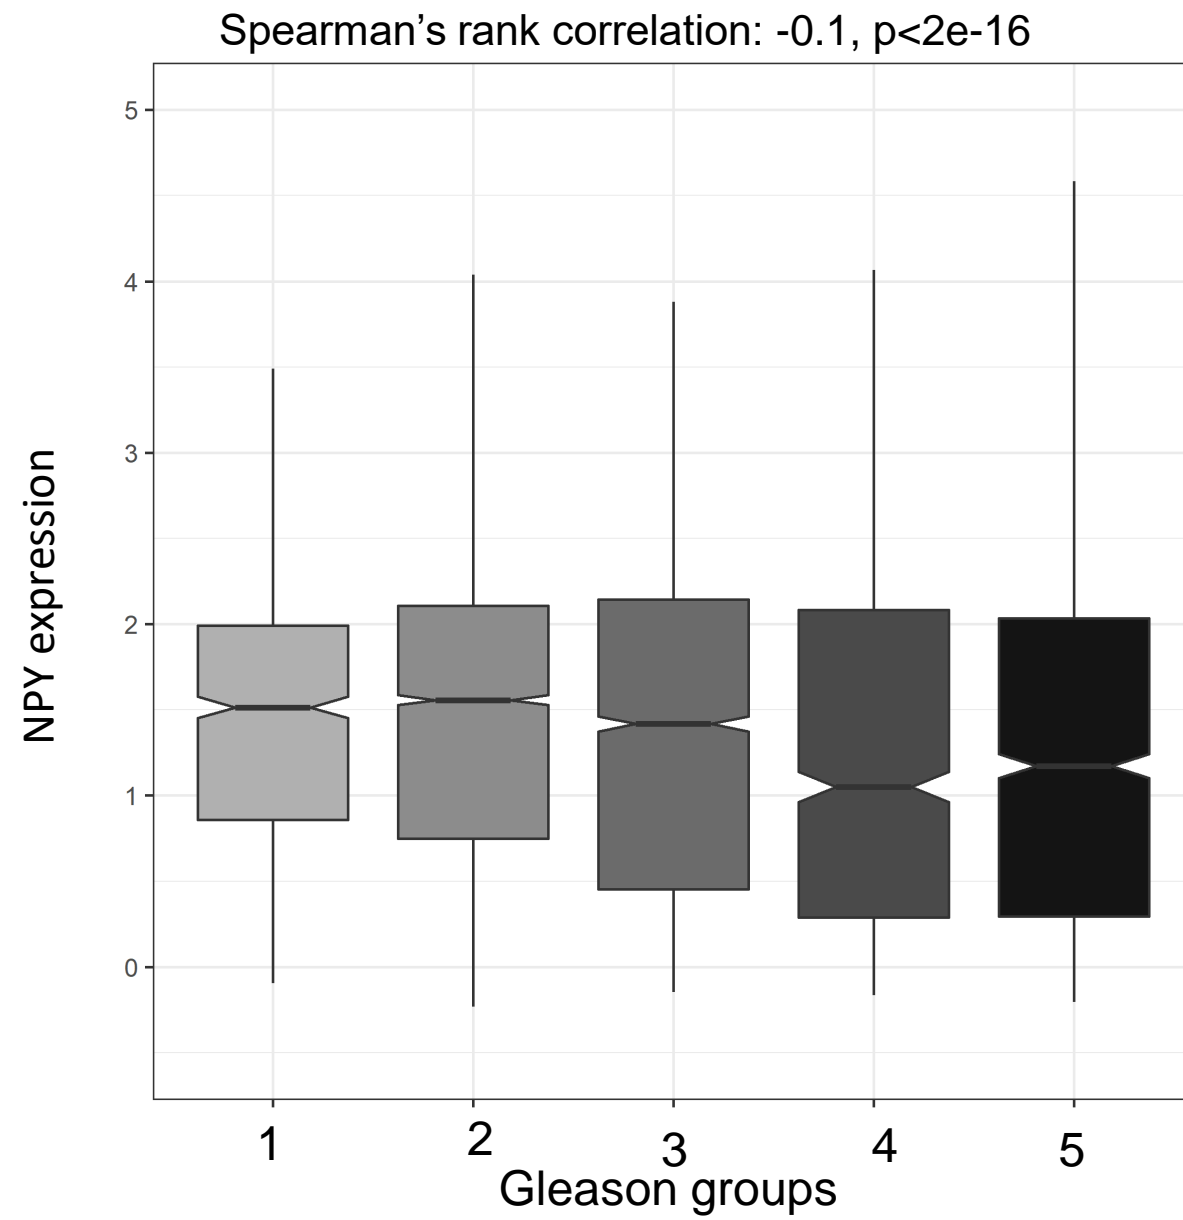

Supplementary 5: Percentage of high genomic risk 9Decipher score) and met outcome across NPY expression deciles in GRID and JHMI cohorts

A

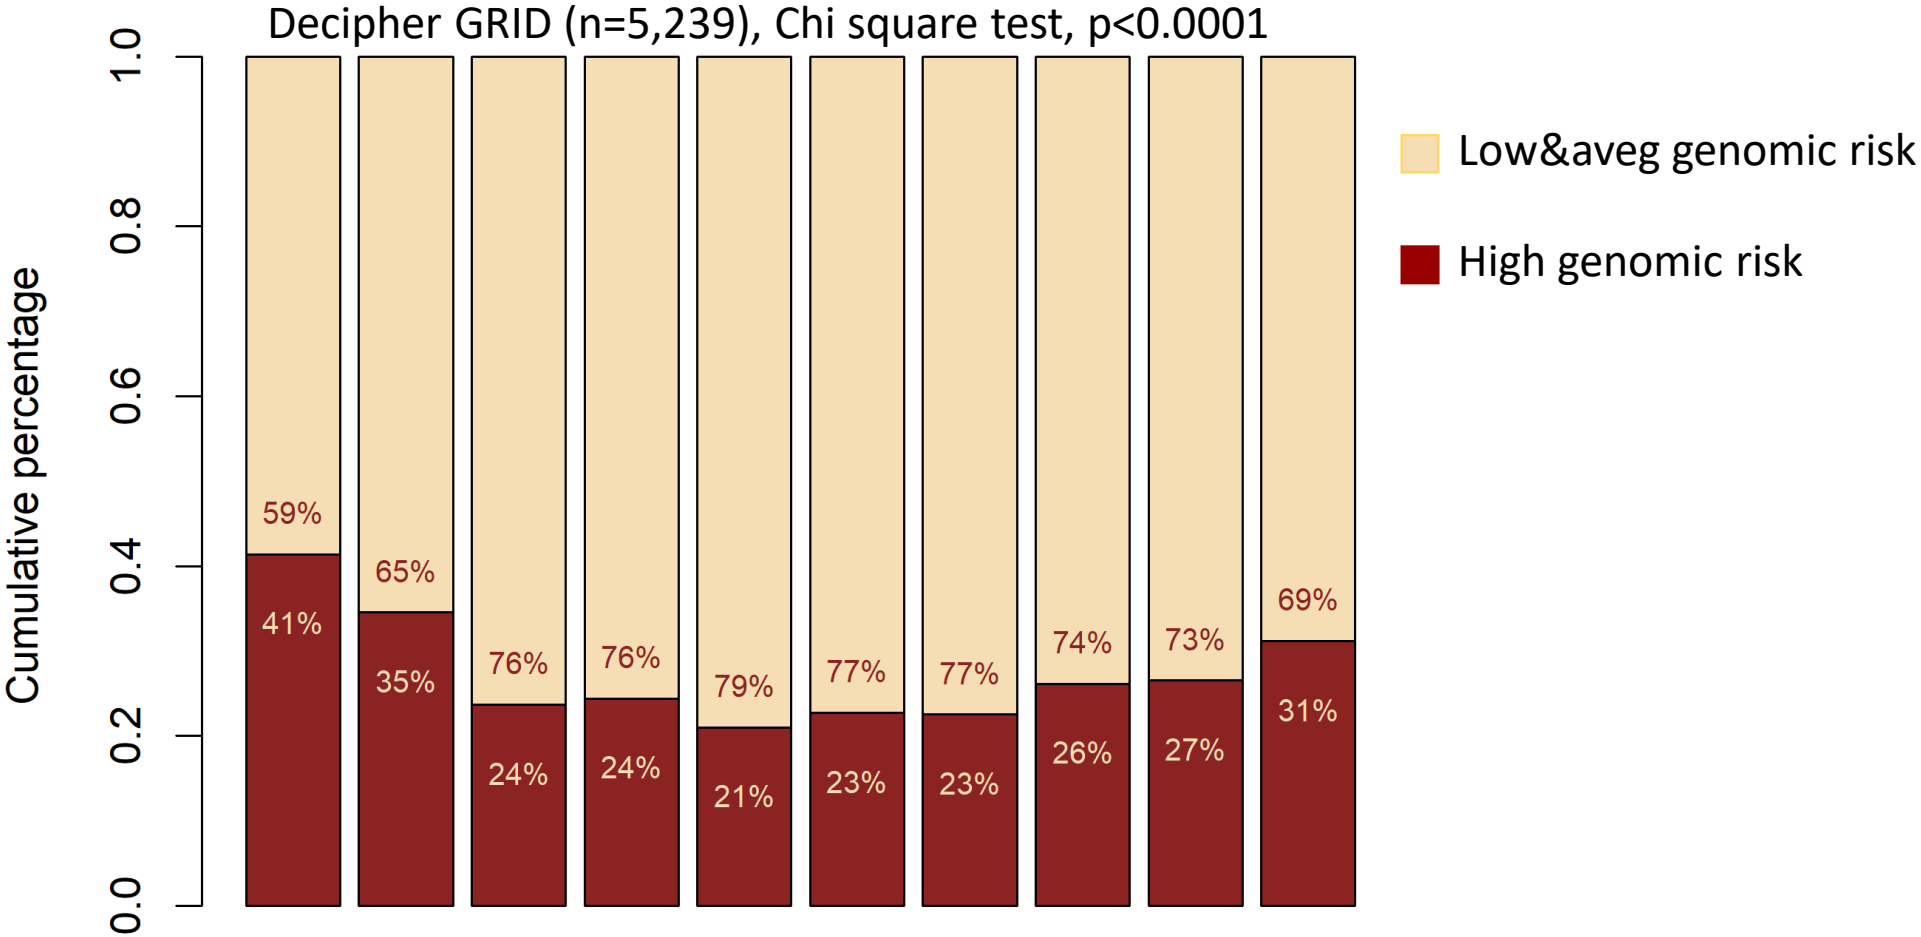

B

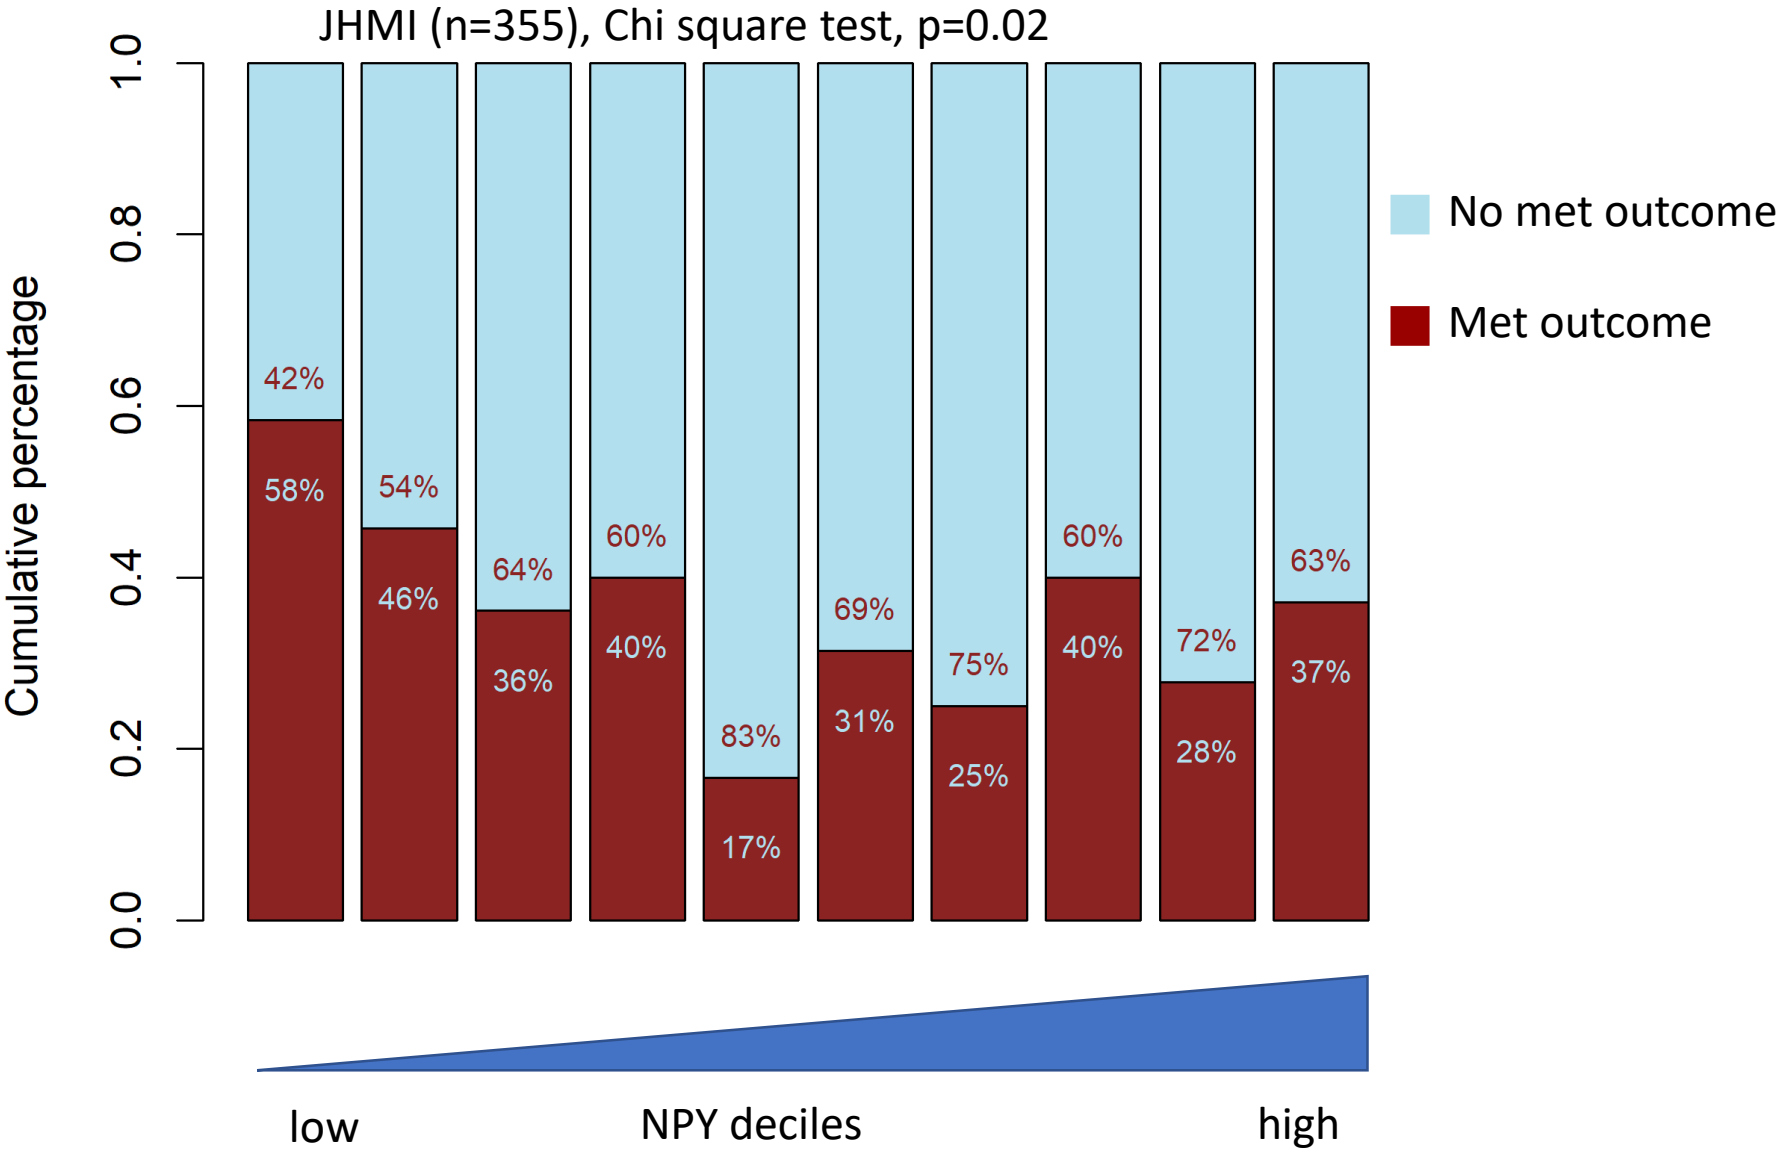

Supplementary 6: Expression of NPY across molecular subtypes in the 12K GRID

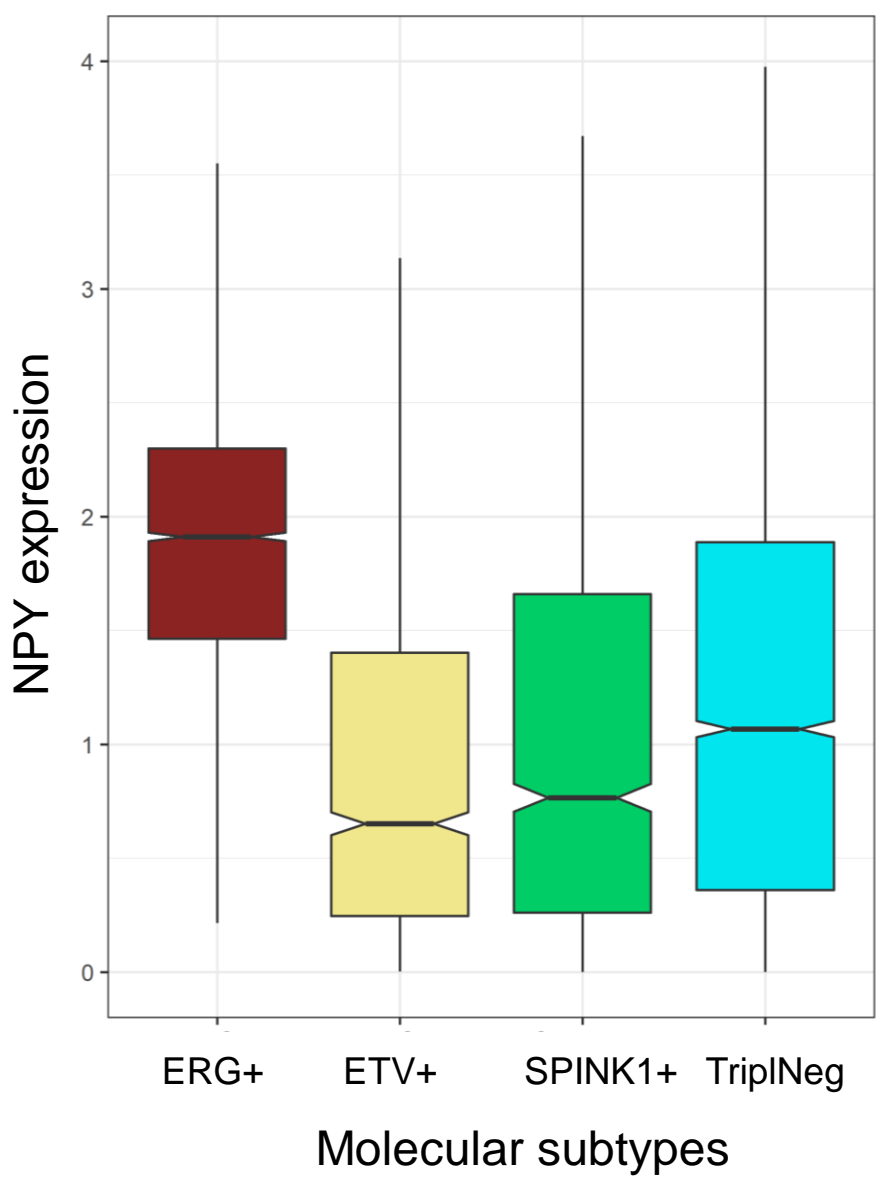

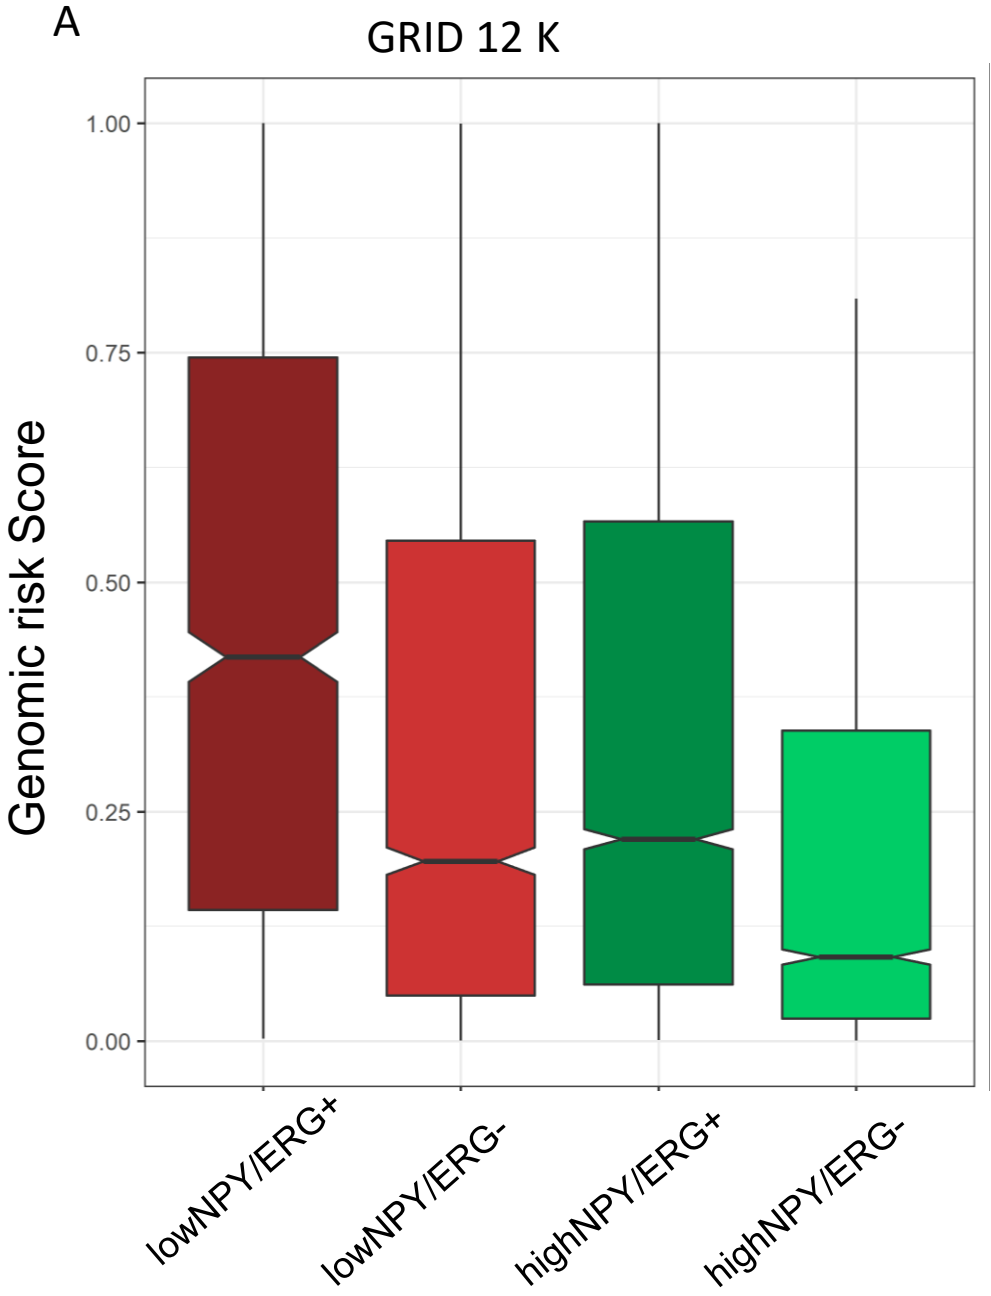



Supplementary 8: KM of the four NPY/ERG subtypes in the JHMI cohort

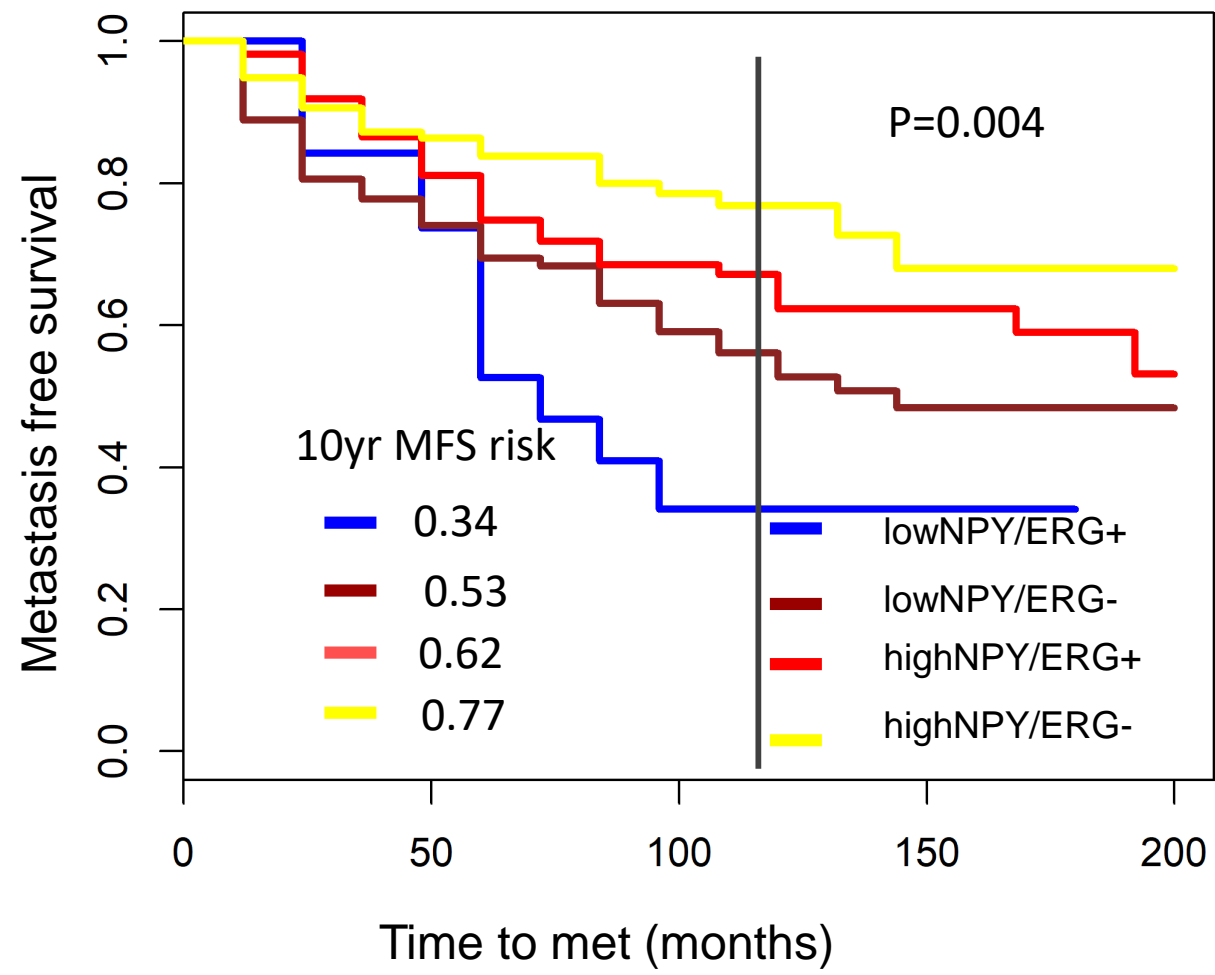

Supplementary 9: A. T-SNE of the differentially expressed genes between low NPY/ERG+ and high NPY ERG- and low NPY/ERG- vs high NPY/ERG- across 5,239 samples

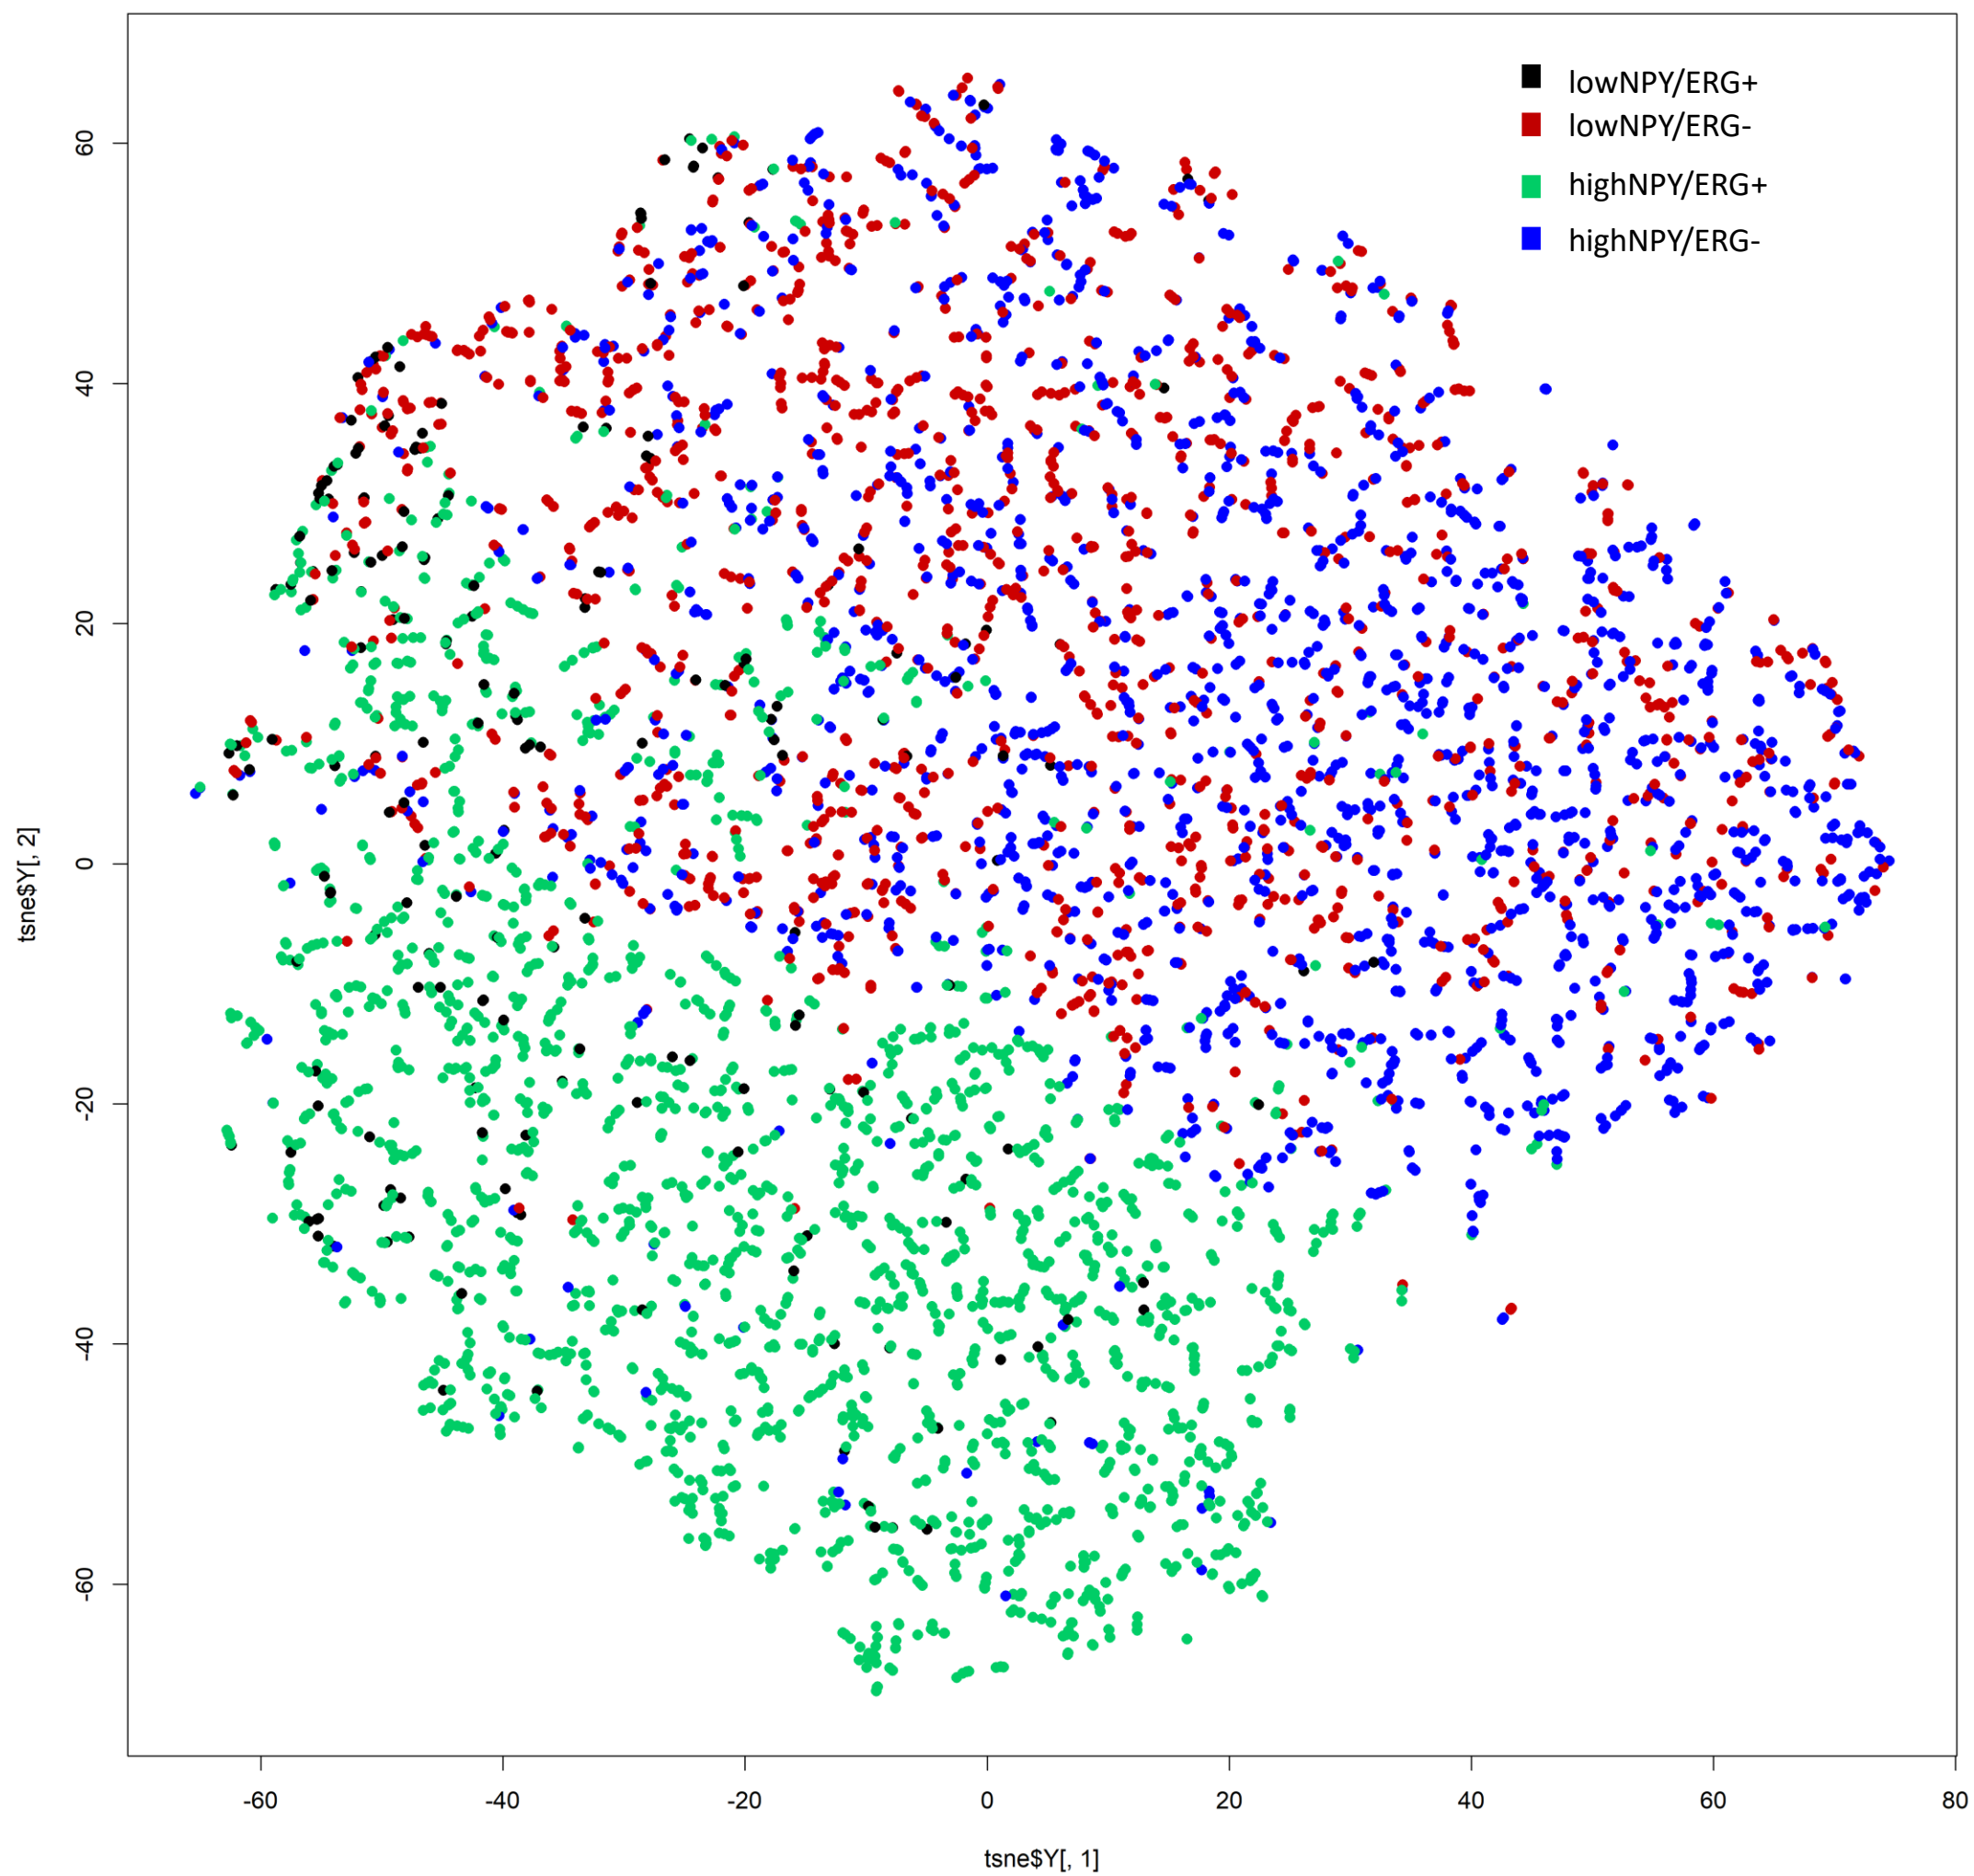

B. Hotelling's  $T^2p < 2e-16$

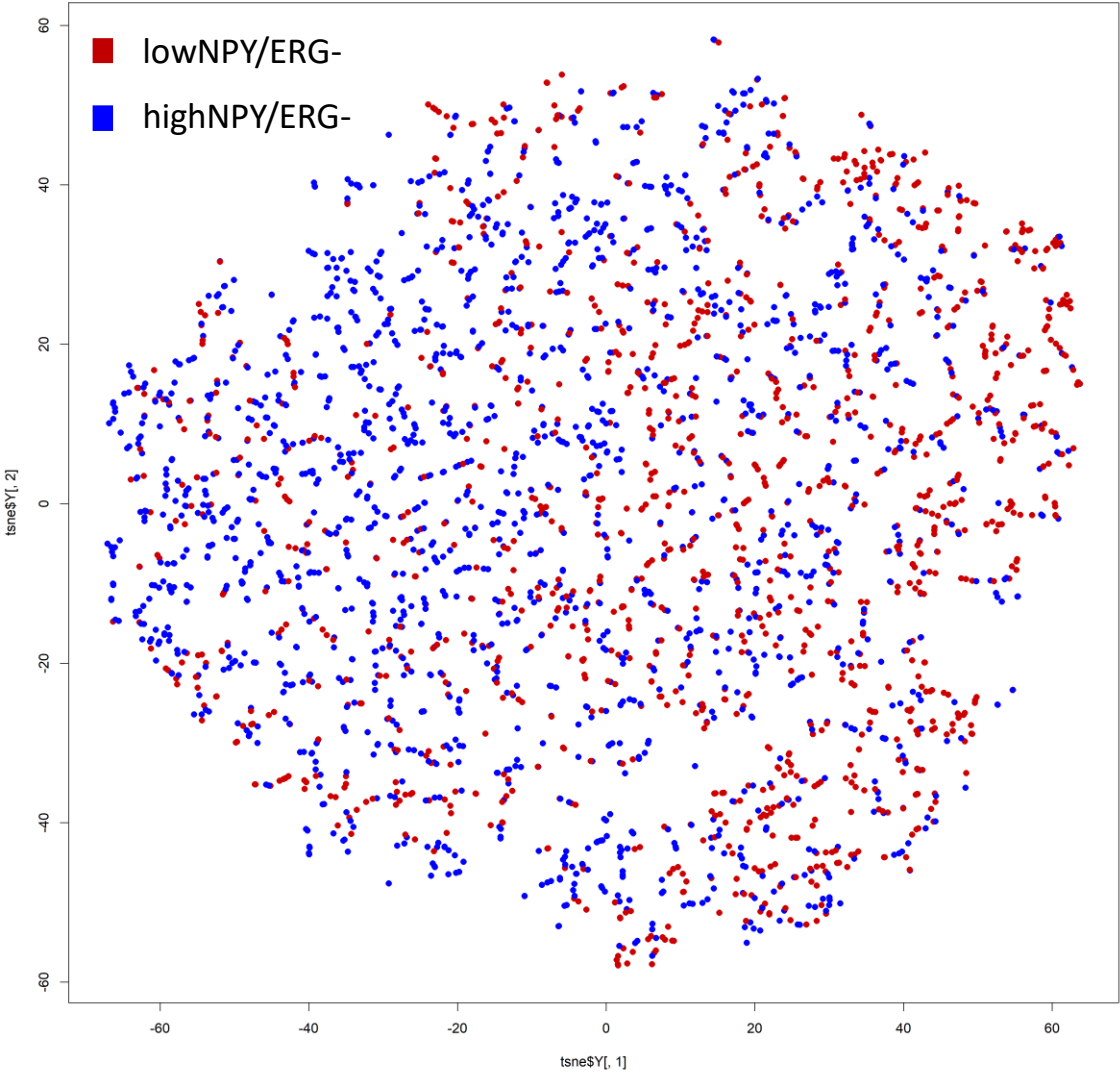

C. Hotelling's  $T^2p < 2e-16$

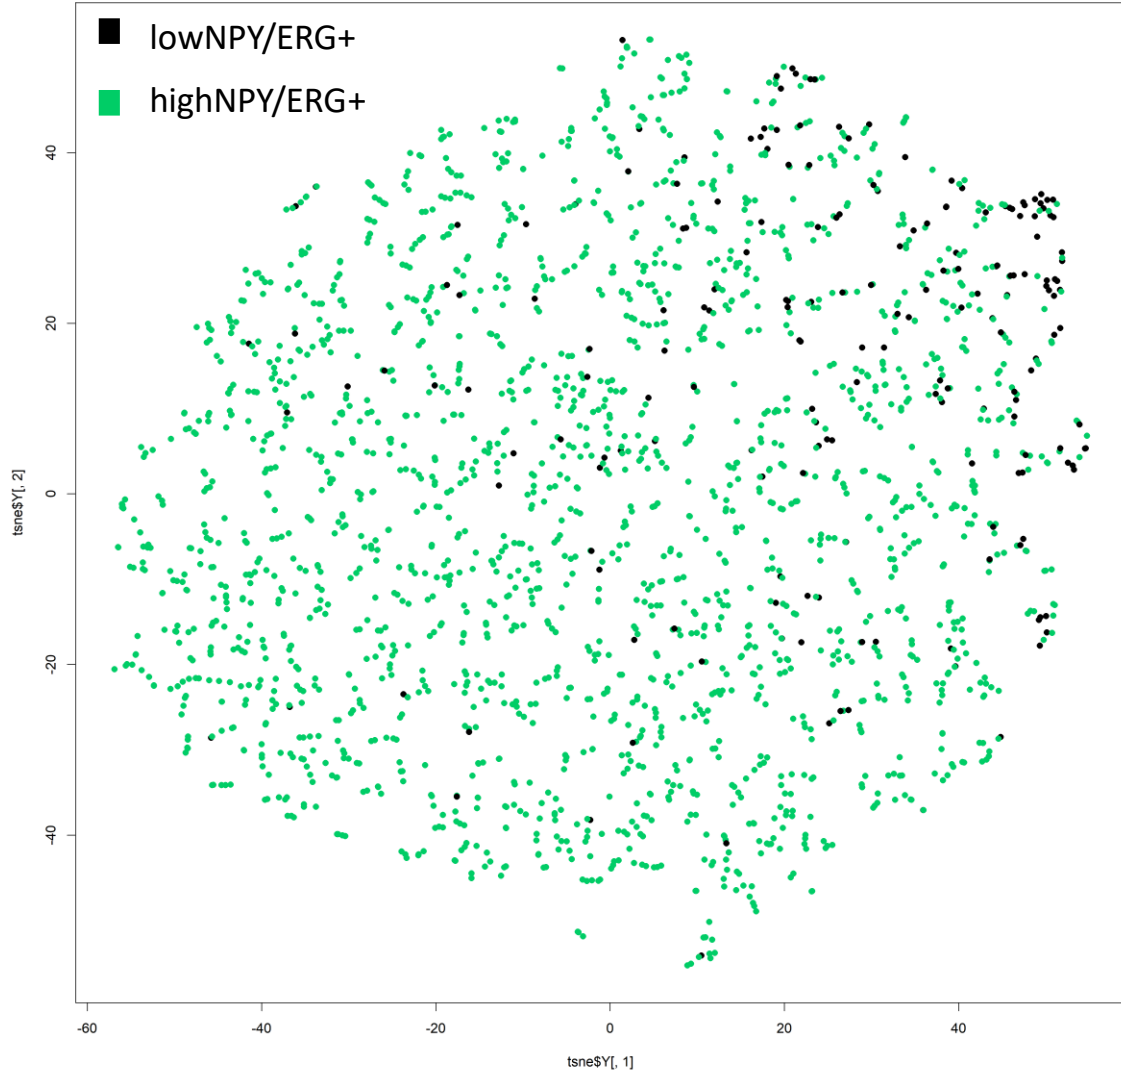

Supplement: NIHMS1611822-supplement-Supplementary_Figures.pdf [file NIHMS1611822-supplement-Supplementary_Figures.pdf]
